# Supplementary material
Source: HighWire-hosted journal article supplement (doi:10.1101/rna.080390.125)
Supplement: Supplemental_Material.docx [file Supplemental_Material.docx]

**SUPPLEMENTARY FIGURES LEGENDS**

**Supplementary Figure 1. (A)** Graph showing in vitro translation of E6 wt and E6 mut mRNA using RRLin different times (2,4,8 and 20 minutes). Radiolabeled products were analyzed and quantified by phosphorimager analysis (n=1). The values were normalized to the highest value, E6 mut at 20 minutes, set as 100%. **(B)** Metabolic pulse-labelling in the presence of proteasome inhibitor (MG132 20 mM for 1 h) followed by IP using and anti-HA tag antibody reveals synthesis of E6 in H1299 cells transfected with the indicated constructs. Quantification is shown below.

**Supplementary Figure 2.** RT-PCR with primers flanking the intronic sequence (Supplementary table 4), followed by gel electrophoresis, showing the splicing of the E6 wt and E6 mut constructs in our cellular model. The presence of the spliced isoform is only observed in the E6 wt construct. In the E6 mutant, as the canonical splice donor site is disrupted by the introduced mutations, the splicing does not occur and only the intron-retained form is detected. Quantification is shown below.

**Supplementary Figure 3.** RepresentativeWestern blot of H1299 cells following transfection with indicated cDNA constructs (Ova, E6 wt-Ova, E6 wt ΔAUGs-Ova and E6 mut-Ova ). Lanes from the same blot were rearranged for clarity.

**Supplementary Figure 4. (A)** Representative Western blot of H1299 cells following transfection with indicated cDNA constructs (E6 wt, E6 wt-β, E6 wt-γ and E6 mut). Lanes from the same blot were rearranged for clarity. **(B)** Representative Western Blot of H1299 cells following transfection with the E6 wt-γ, E6 wt-γ with changed codons 1-2, E6 wt-γ with changed codons 1-5 and E6 wt-γ with changed codons 1-8 **(C)** IL-2 release by OT-1 CD8+ T cells in response to transiently co- transfected H1299 cells with Kb and E6 wt-γ, E6 wt-γ Codons 1-8 and E6 mut constructs is used as an indirect measure of antigenic peptide substrate synthesis. IL-2 concentration in the medium from co-cultured cells was analyzed by ELISA. Data represent three independent experiments (mean ±SD). **(D)** Representative Western Blot of H1299 cells following transfection with the E6 wt-γ, E6 wt-γ with changed codons 6-8, E6 wt-γ with changed codons 1-8 and E6 wt-γ with changed codons 1-12. **(E)** RepresentativeWestern Blot of H1299 cells following transfection with the E6 wt-γ, E6 wt-γ with changed codons 13-14, E6 wt-γ with changed codons 1-17 and E6 wt-γ with changed codons 13-17. **(F)** RepresentativeWestern Blot of H1299 cells following transfection with the E6 wt-γ, E6 wt-γ with changed codons 1-12, E6 wt-γ with changed codons 1-17 and E6 wt-γ with changed codons 9-12.

**Supplementary Figure 5.** In silico prediction of mRNA secondary structures for Rare_1-12, Codon_1-17, and Rare_1-8. (A) Circular plots generated using RNA-Spot, illustrating the structural features of each construct. (B) Comparison of Rare_1-8 and Rare_1-12 and Codon_1-17 and Rare_1-12 structures with R-chie.

**SUPPLEMENTARY TABLES LEGENDS**

**Supplementary Table 1.** Codon frequency described in Figure 5B. The usage of each codon is expressed as the frequency per 1000 codons.

**Supplementary Table 2**. Multiple nucleotide sequence alignment of the 3’ prime of E6 of different HPV strains (16,6 and 11). CLUSTAL O(1.2.4).

**Supplementary Table 3**. List of plasmids, primers and cloning methods.

**Supplementary Table 4**. List of qPCR primers.
